# Supplementary material for: A Nanoparticle-Based Label-Free Sensor for Screening the Relative Antioxidant Capacity of Hydrosoluble Plant Extracts
Source: Sensors (Basel). 2019 Jan 30;19(3):590. doi: 10.3390/s19030590 (PMC6387368; doi:10.3390/s19030590)
Supplement: Supplementary file 1 [file sensors-19-00590-s001.pdf]

Supplementary Materials

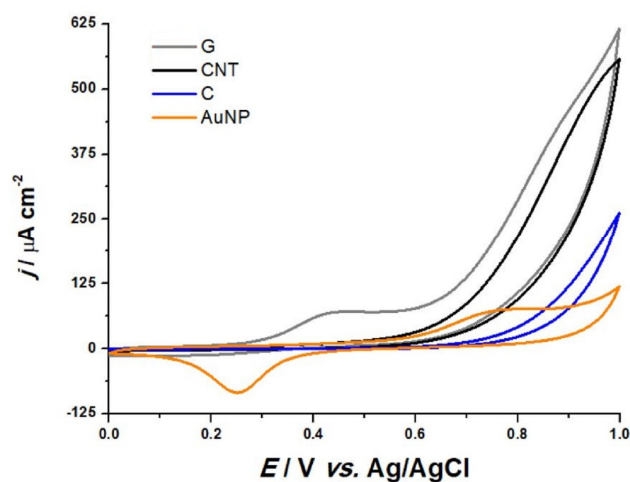

**Figure S1.** CV in 0.1 M NaPB, pH 7.0, in the presence of 6 mM  $H_2O_2$  addition,  $v = 50 \text{ mV s}^{-1}$  for bare SPE (C) and nanoparticle modified SPE with AuNP, CNT and G.

**Table S1.** Capacitance values calculated for all sensor types from the CVs in figure S1.

| Sensor (SPE) | $C/\text{mF cm}^{-2}$ |
|--------------|-----------------------|
| bare (C)     | 0.03                  |
| G            | 1.23                  |
| CNT          | 0.30                  |
| AuNP         | 0.34                  |

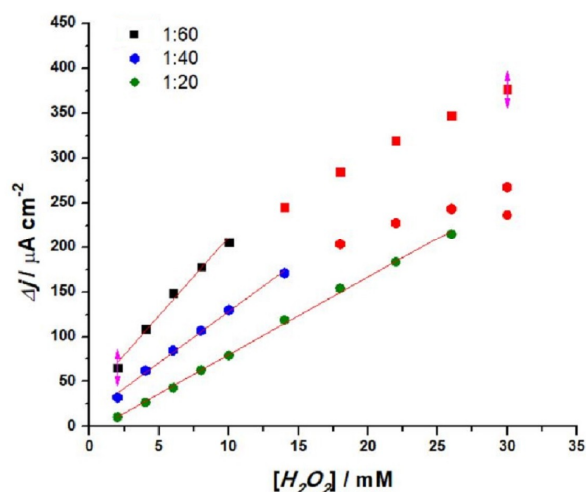

**Figure S2.** Calibration plots recorded at 0.55 V vs. Ag/AgCl in 0.1 M NaPB with an extract for different dilutions, pH = 7.0.

**Table S2.** Performance parameters for the three different E: buffer dilutions in figure S2.

| Extract | $S/\text{mA mM}^{-1} \text{ cm}^{-2}$ | $R^2$ | LoD/mM |
|---------|---------------------------------------|-------|--------|
| 1:20    | 8.66                                  | 0.998 | 0.60   |
| 1:40    | 11.37                                 | 0.995 | 0.75   |
| 1:60    | 17.46                                 | 0.991 | 1.76   |

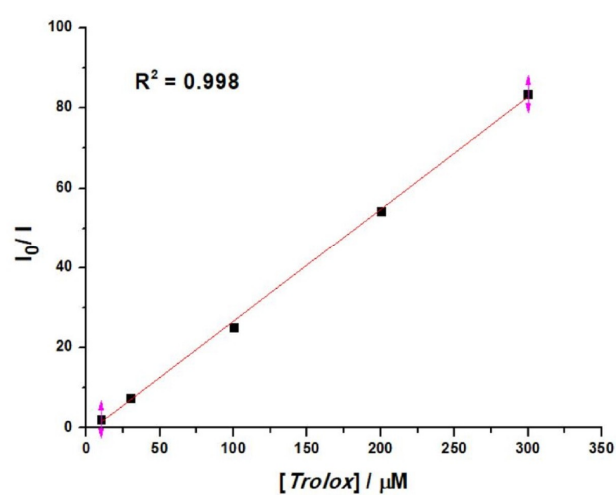

**Figure S3.** Calibration plot of CL signal ( $I_0/I$ ) as a function of trolox concentrations.

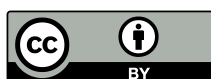

© 2018 by the authors. Submitted for possible open access publication under the terms and conditions of the Creative Commons Attribution (CC BY) license (<http://creativecommons.org/licenses/by/4.0/>).
